# Supplementary material for: The mechanism of chronic toxicity to Daphnia magna induced by graphene suspended in a water column
Source: Royal Society of Chemistry journal article supplement (doi:10.1039/c6en00361c), 2016-01-01
Supplement: c6en00361c1.pdf [file c6en00361c1.pdf]

1     **The mechanism of chronic toxicity induced by graphene suspended in**  
2                                   **water column to *Daphnia magna*<sup>1</sup>**

3   Wenhong Fan,<sup>\*a</sup> Yingying Liu,<sup>a</sup> Zhizhen Xu,<sup>b</sup> Xiangrui Wang,<sup>a</sup> Xiaomin Li<sup>a</sup> and Shenglian Luo <sup>\*c</sup>

4   **Supplementary Information**

5   Number of supplementary information pages: 8

6   Number of Tables: 2

7   Number of Figures: 5

8

---

<sup>a</sup> School of Space and Environment, Beihang University, No. 37, XueYuan Road, HaiDian District, Beijing 100191, PR China. Email: [fanwh@buaa.edu.cn](mailto:fanwh@buaa.edu.cn); Tel: (86)-10-82338630; fax: (86)-10-82338630

<sup>b</sup> Key Laboratory of Occupational Safety and Health, Beijing Municipal Institute of Labor Protection, Beijing 100054, PR China

<sup>c</sup> School of Environmental and Chemical Engineering, Nanchang Hangkong University, No. 696, FengHe Road, Nanchang, Jiangxi 330063, PR China. Email: [slou@hnu.edu.cn](mailto:slou@hnu.edu.cn); Tel: (86)-791-83953373; fax: (86)-791-83953373

9 **Table S1** Data of *D. magna* after 21-day chronic exposure to 10 mg/L PVP solution. Results are  
 10 expressed as the mean (10 replicates)  $\pm$  standard deviation.

|                                                 | Control         | PVP             |
|-------------------------------------------------|-----------------|-----------------|
| <b>Mortality (%)</b>                            | 0               | 0               |
| <b>Length on 21st day (mm)</b>                  | 3.02 $\pm$ 0.15 | 3.12 $\pm$ 0.09 |
| <b>Average number of offspring (individual)</b> | 36.0 $\pm$ 7.0  | 35.0 $\pm$ 9.6  |
| <b>Time to first brood (d)</b>                  | 11.3 $\pm$ 1.2  | 11.7 $\pm$ 0.9  |
| <b>Neonates of first brood (individual)</b>     | 4.4 $\pm$ 2.1   | 4.1 $\pm$ 2.0   |

12 **Table S2** Metallic impurity contents of the four CNMs<sup>a</sup>

| CNMs         | Metallic impurity contents (wt%) |      |      |      |      |
|--------------|----------------------------------|------|------|------|------|
|              | Mo                               | Co   | Ni   | Y    | Cu   |
| <b>C60</b>   | — <sup>b</sup>                   | —    | —    | —    | 0.06 |
| <b>SWCNT</b> | —                                | 0.73 | 0.33 | 0.17 | —    |
| <b>MWCNT</b> | 0.55                             | 0.16 | 0.38 | —    | —    |
| <b>GN</b>    | —                                | —    | —    | —    | 0.15 |

13 <sup>a</sup> The metallic impurity contents are measured using ICP-MS, n=3. The relative standard deviations

14 are within  $\pm 5\%$ .

15 <sup>b</sup> No information

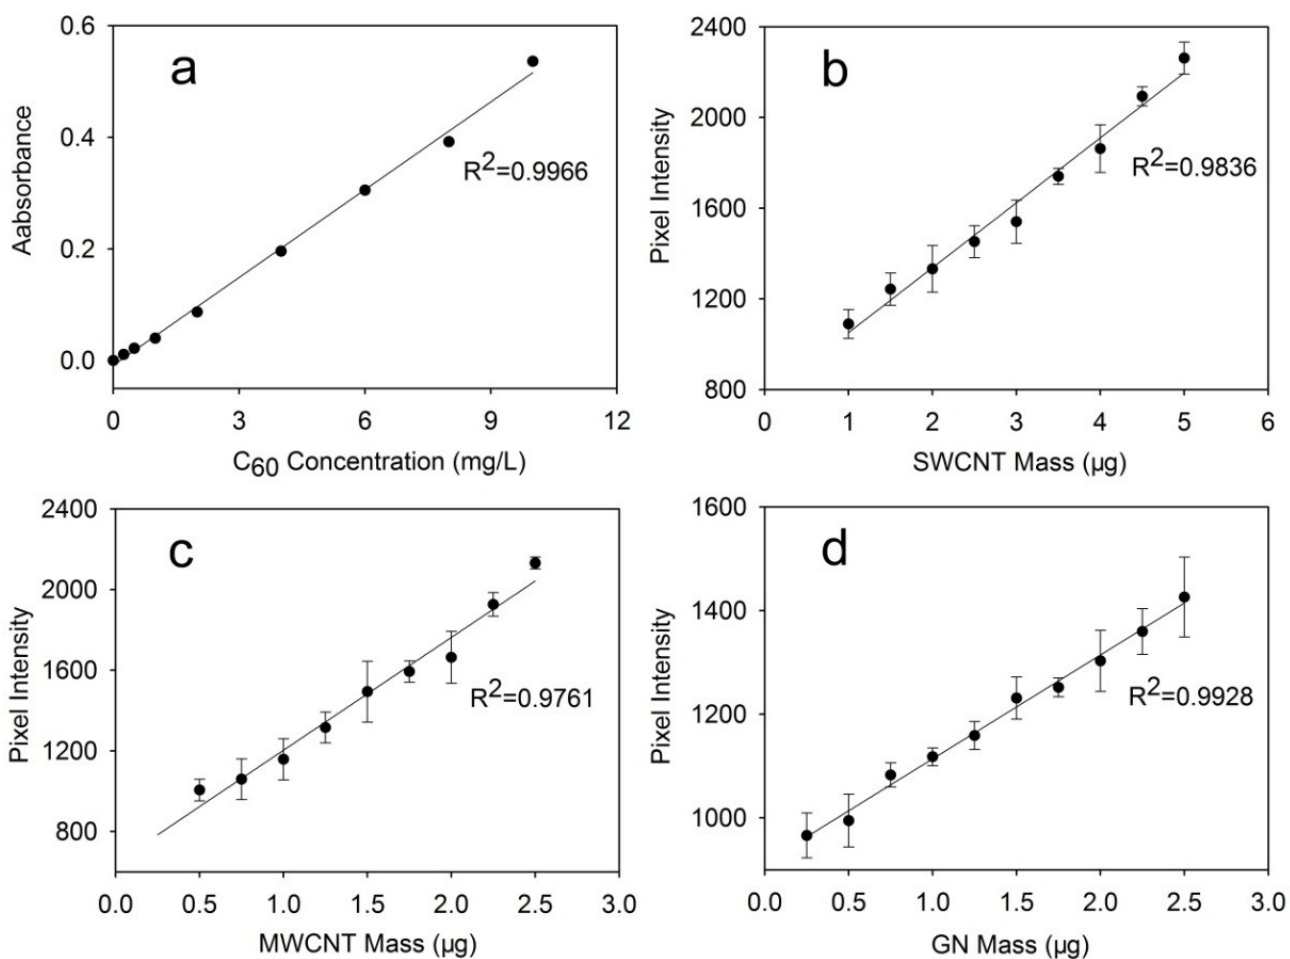

16

17 **Fig. S1.** The standard curves of C<sub>60</sub> (a), SWCNT (b), MWCNT (c), and GN (d) prepared with our  
 18 standard PVP-CNM suspension. The standard deviations in C<sub>60</sub> (a) are generally smaller than the dot  
 19 sizes.

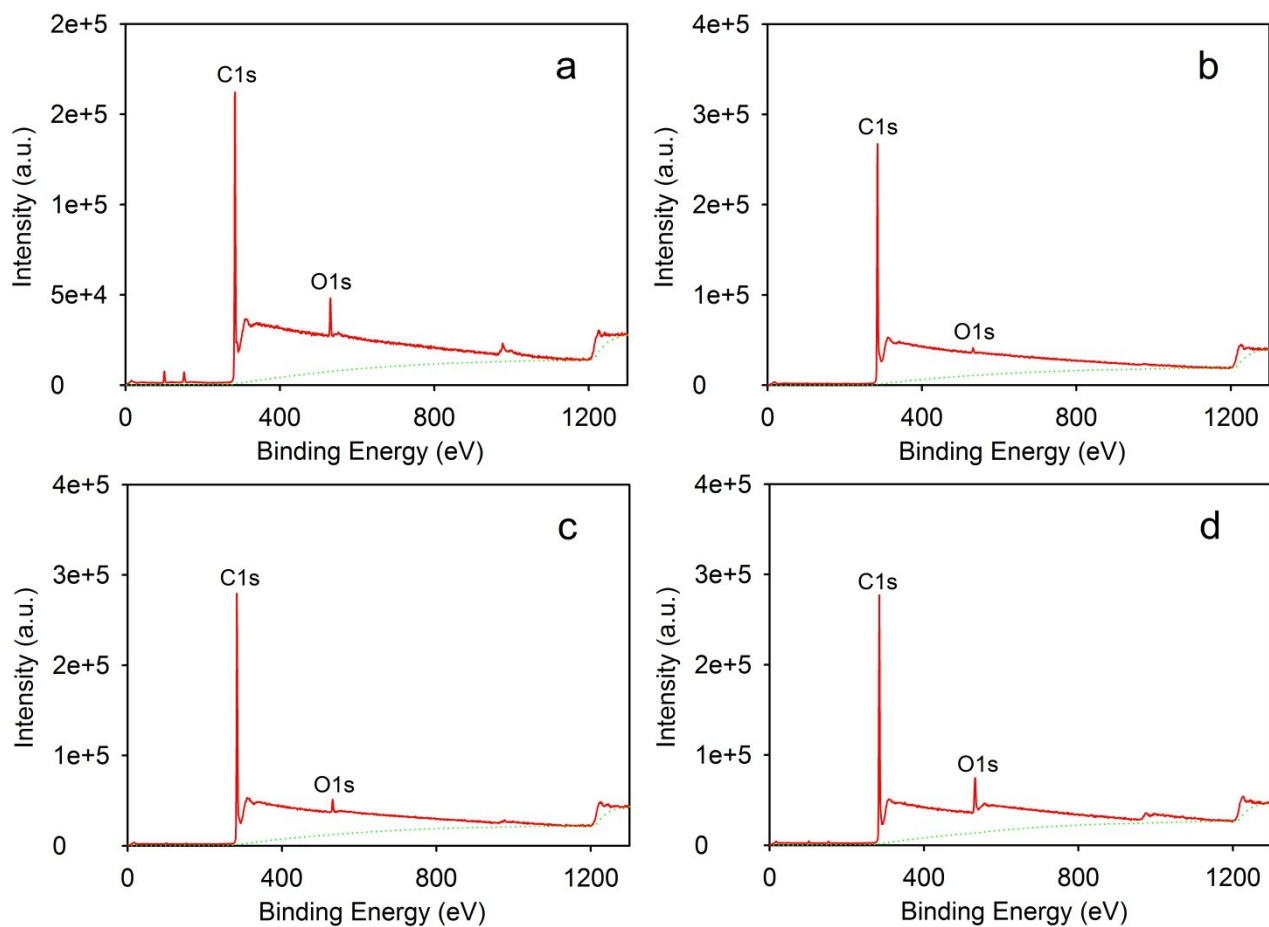

**Fig. S2.** XPS spectra of the four CNMs. C<sub>60</sub> (a), SWCNT (b), MWCNT (c), and GN (d)

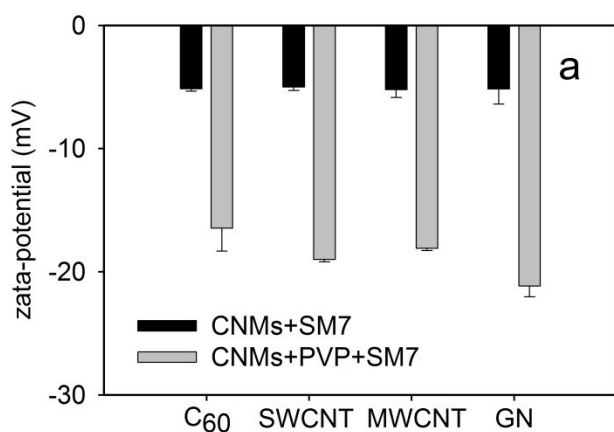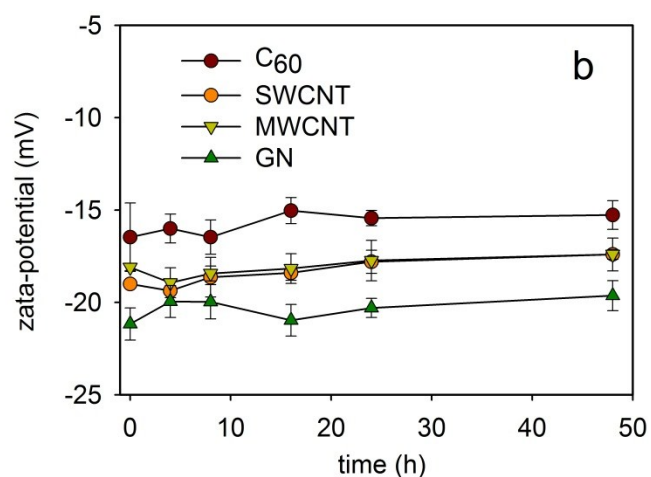

23

24 **Fig. S3.** (a). Zeta potentials of 1 mg/L CNMs in SM7 medium with PVP or without PVP. (b). Zeta  
 25 potentials of 1 mg/L CNMs in SM7 medium with the presence of PVP during a period of 48 h. All the  
 26 values are the means of 3 replicates.

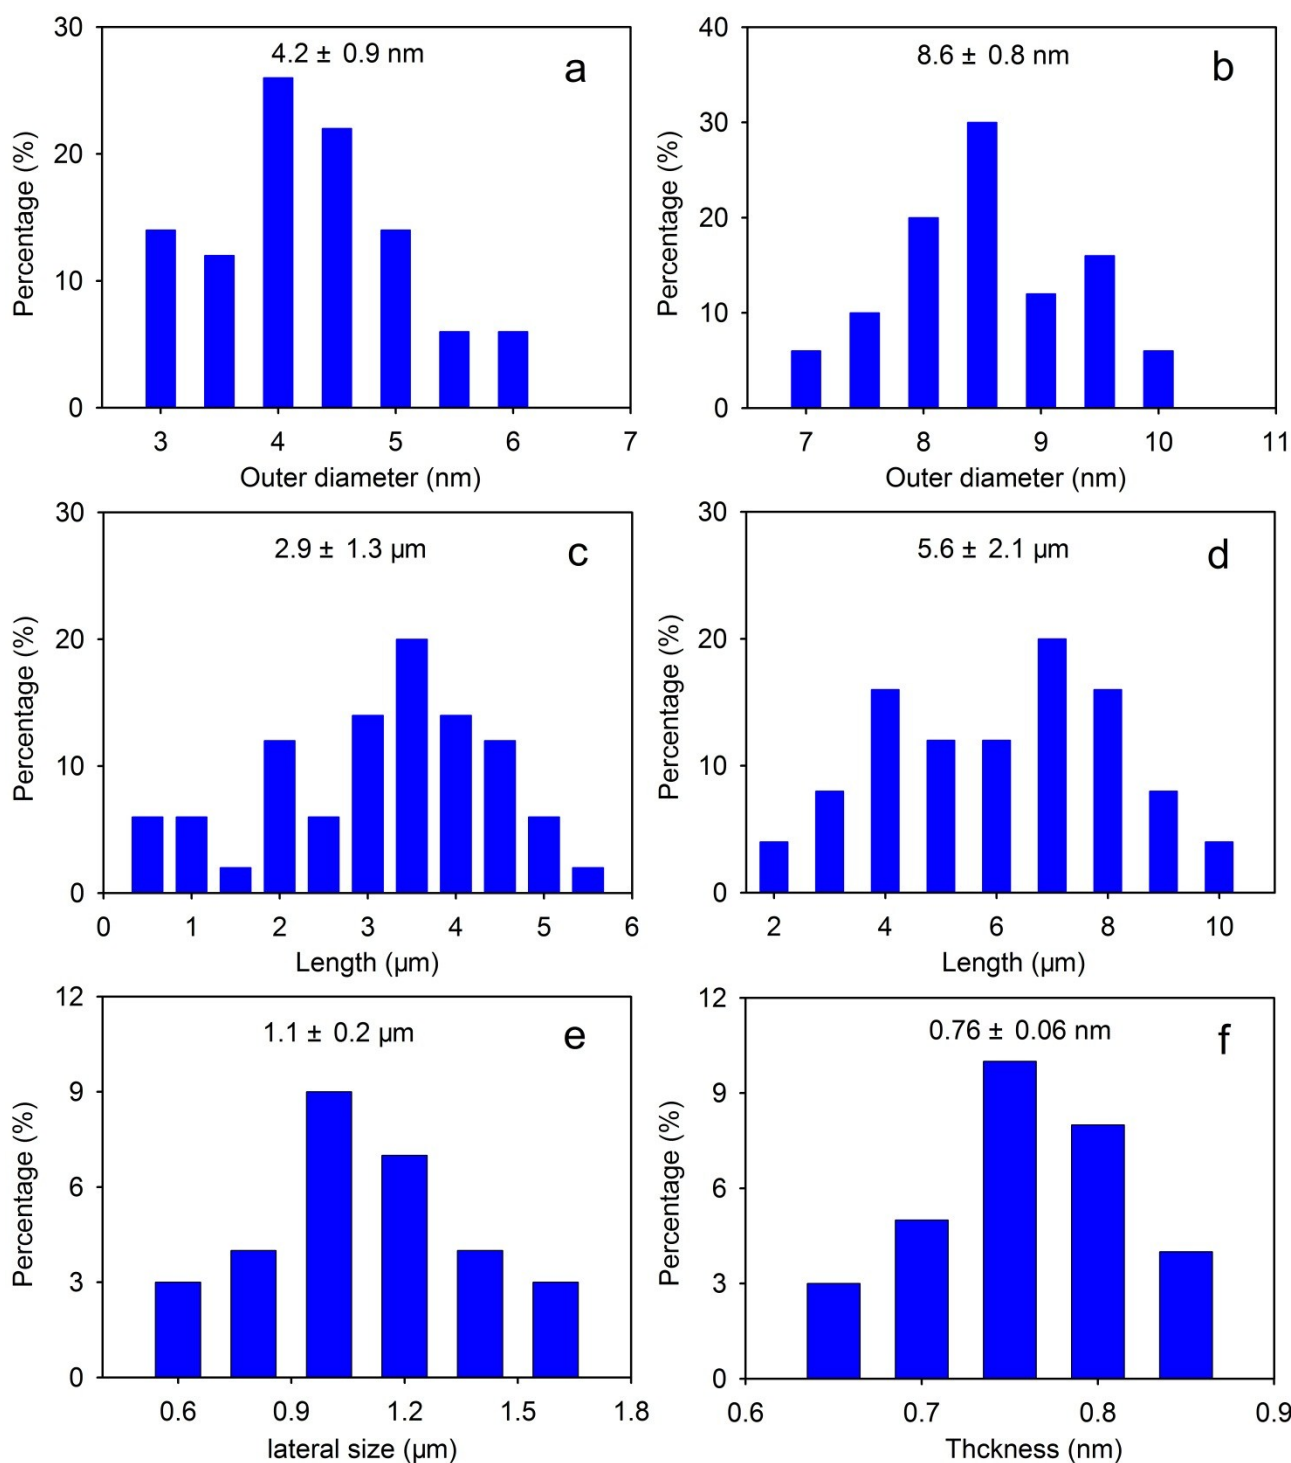

27

28 **Fig. S4.** Histograms of CNM size distribution. (a) Outer diameter of SWCNT. (b) Outer diameter of  
 29 MWCN. (c) Length of SWCNT. (d) Length of MWCNT. (e) Lateral size of GN. (f) Thickness of GN. The  
 30 lengths and outer diameters are measured using TEM,  $n = 100$ . The lateral size and thickness are  
 31 measured using AFM,  $n = 30$ . The statistical results are expressed as the mean  $\pm$  standard deviation.

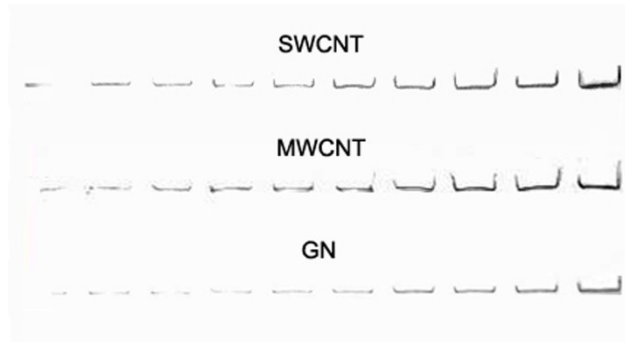

33

34 **Fig. S5.** Optical image for bands of CNM standard samples after electrophoresis. The mass of  
35 standard samples in gels are 1-5  $\mu\text{g}$  for SWCNT, and 0.25-2.5  $\mu\text{g}$  for MWCNT and GN, corresponding  
36 to that of standard curves shown in Fig. S1.

37
